# Supplementary material for: Chiral recognition of amino acid esters by a novel oxalic amide-linked bisporphyrin
Source: Royal Society of Chemistry journal article supplement (doi:10.1039/c3dt50380a), 2013-01-01
Supplement: c3dt50380a.pdf [file c3dt50380a.pdf]

## Supporting Information

### **Chiral recognition of amino acid esters by a novel oxalic amide-linked bisporphyrin**

Jiaxun Jiang,<sup>a</sup> Zhiqiang Feng, Baozhen Liu, Chuanjiang Hu,<sup>\*a,b</sup> Yong Wang\*

<sup>a</sup> Key Laboratory of Organic Synthesis of Jiangsu Province, College of Chemistry, Chemical Engineering and Materials Science, Soochow University, Suzhou 215123, P.R. China

<sup>b</sup> State Key Laboratory & Coordination Chemistry Institute, Nanjing University, Nanjing 210093, P. R. China

Tel.: +86-25-65880903

Fax: +86-25-65880903

E-mail: [cjhu@suda.edu.cn](mailto:cjhu@suda.edu.cn)

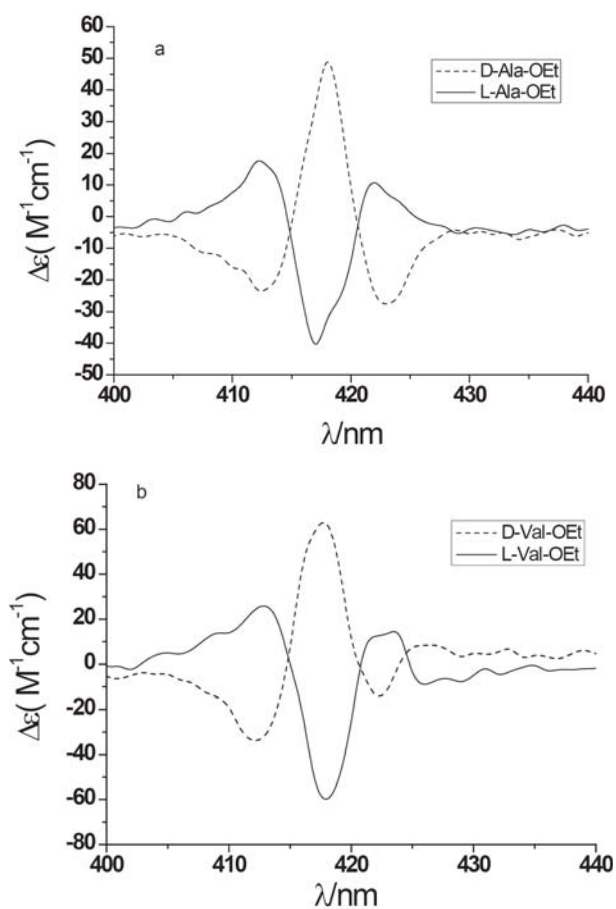

Figure S1. Circular dichroism spectra of a solution of compound **1** ( $3.4 \times 10^{-6} M$ ) and 400 equivalents of (a) L- (solid line) and D- (dash line) alanine ethyl ester, (b) L-(solid line) and D-(dash line) valine ethyl ester in methylene dichloride at 25 °C.

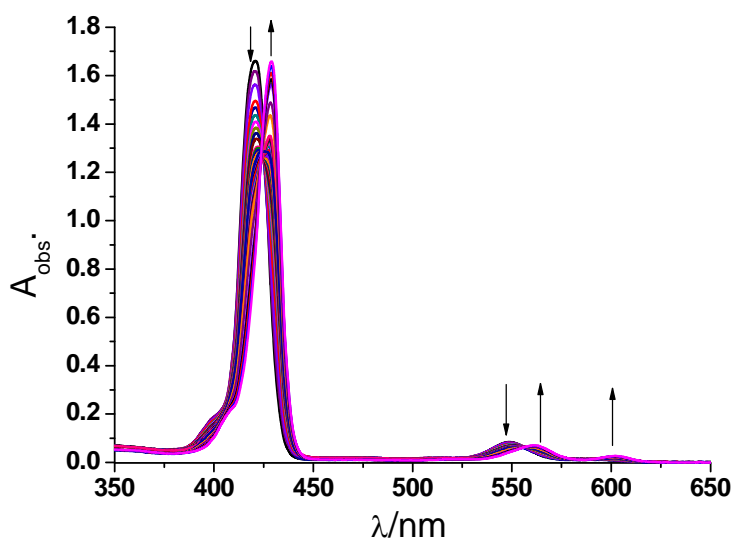

Figure S2. UV-visible spectral changes of compound 1 ( $3.0 \times 10^{-6}$  M) in methylene dichloride upon addition of D-Phe-OEt as the host: guest molar ratio changes from 1:0 to 1:167.5 at 25°C. Arrows indicate absorbance changes with increasing guest concentrations.

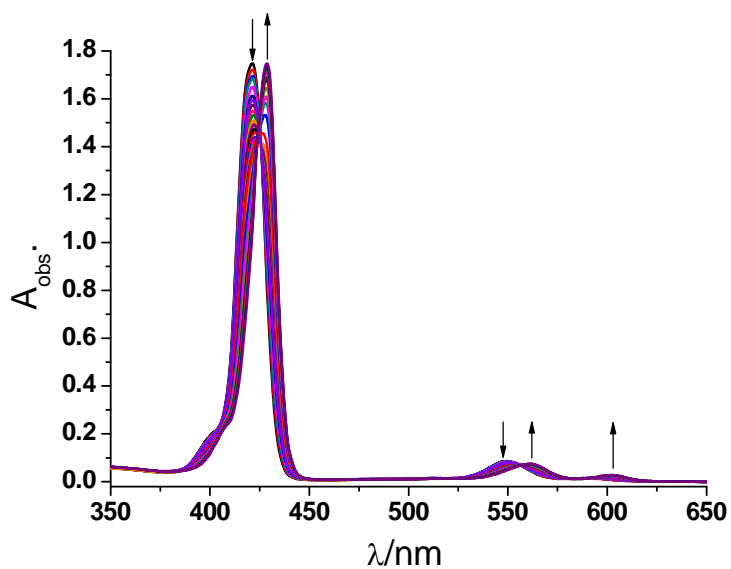

Figure S3. UV-visible spectral changes of compound 1 ( $3.2 \times 10^{-6}$  M) in methylene dichloride upon addition of D-Ala-OEt as the host: guest molar ratio changes from 1:0 to 1:167.5 at 25°C. Arrows indicate absorbance changes with increasing guest concentrations.

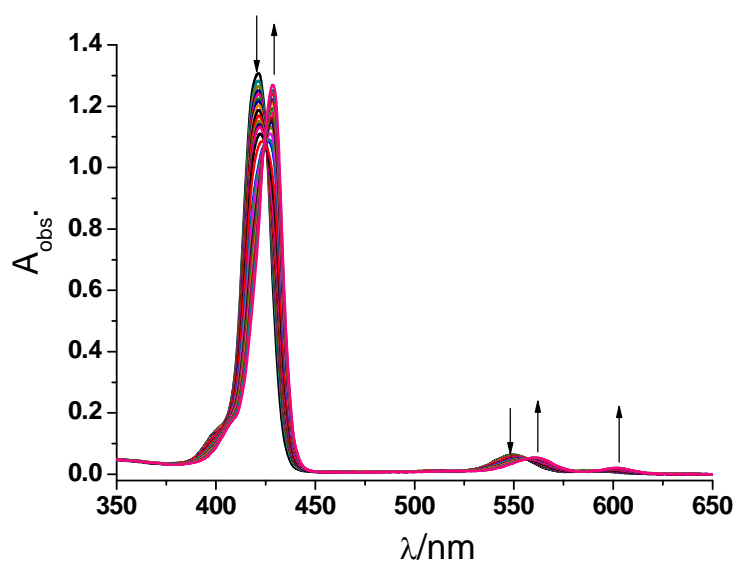

Figure S4. UV-visible spectral changes of compound 1 ( $2.4 \times 10^{-6}$  M) in methylene dichloride upon addition of L-Ala-OEt as the host: guest molar ratio changes from 1:0 to 1:250 at 25 °C. Arrows indicate absorbance changes with increasing guest concentrations.

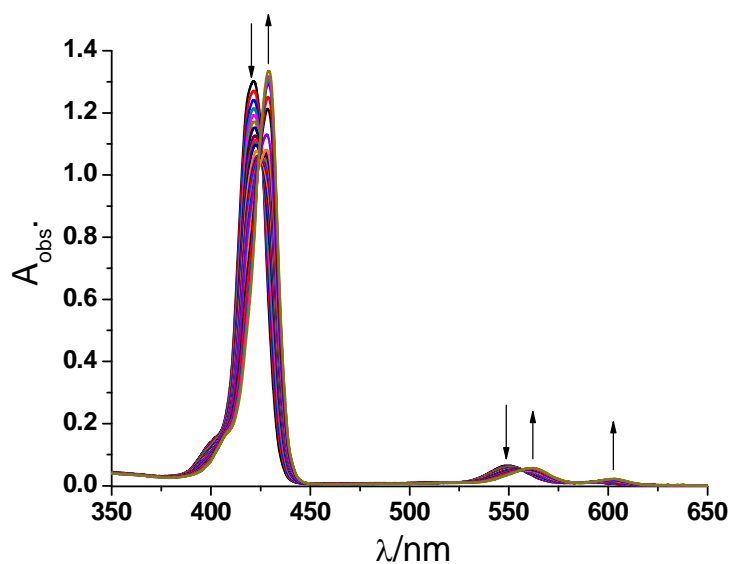

Figure S5. UV-visible spectral changes of compound 1 ( $2.4 \times 10^{-6}$  M) in methylene dichloride upon addition of D-Leu-OEt as the host: guest molar ratio changes from 1:0 to 1:250 at 25 °C. Arrows indicate absorbance changes with increasing guest concentrations.

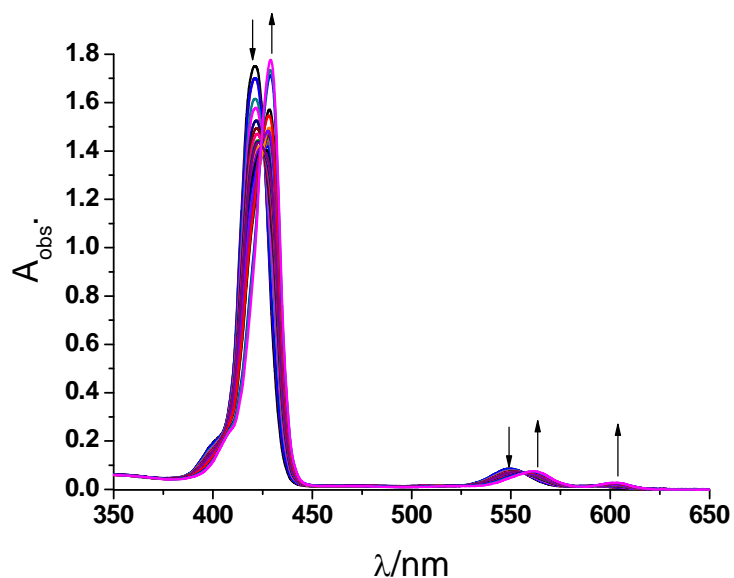

Figure S6. UV-visible spectral changes of compound 1 ( $3.2 \times 10^{-6}$  M) in methylene dichloride upon addition of L-Leu-OEt as the host: guest molar ratio changes from 1:0 to 1:167.5 at 25 °C. Arrows indicate absorbance changes with increasing guest concentrations.

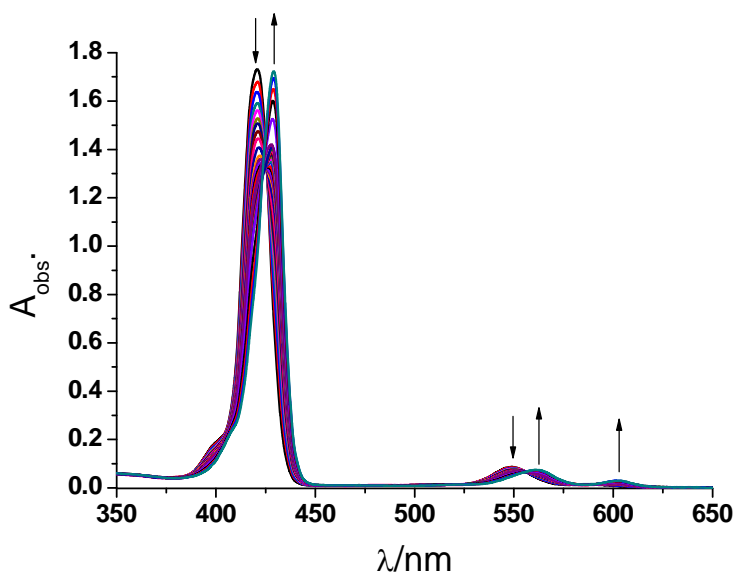

Figure S7. UV-visible spectral changes of compound 1 ( $3.2 \times 10^{-6}$  M) in methylene dichloride upon addition of D-Phg-OEt as the host: guest molar ratio changes from 1:0 to 1:167.5 at 25 °C. Arrows indicate absorbance changes with increasing guest concentrations.

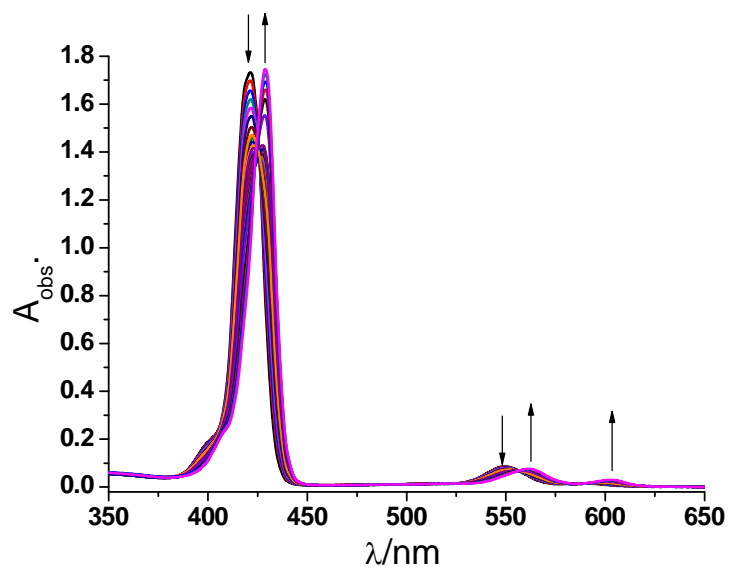

Figure S8. UV-visible spectral changes of compound 1 ( $3.2 \times 10^{-6}$  M) in methylene dichloride upon addition of L-Phg-OEt as the host: guest molar ratio changes from 1:0 to 1:167.5 at 25 °C. Arrows indicate absorbance changes with increasing guest concentrations.

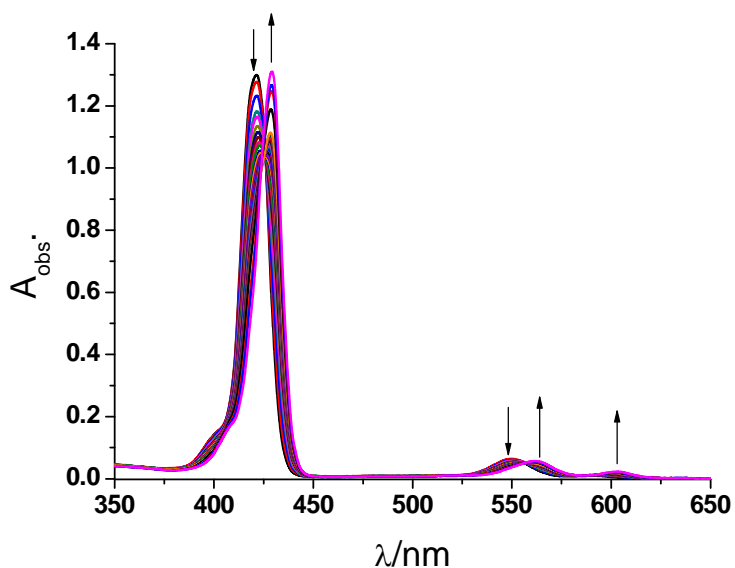

Figure S9. UV-visible spectral changes of compound 1 ( $2.4 \times 10^{-6}$  M) in methylene dichloride upon addition of D-Val-OEt as the host: guest molar ratio changes from 1:0 to 1:250 at 25 °C. Arrows indicate absorbance changes with increasing guest concentrations.

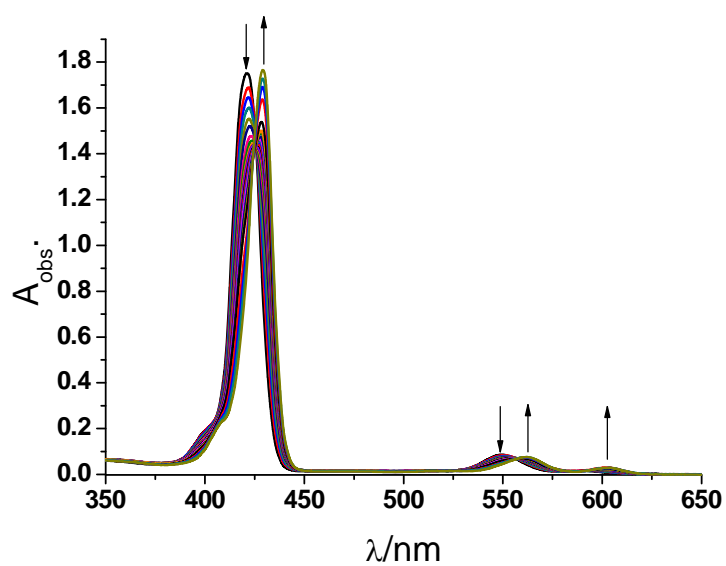

Figure S10. UV-visible spectral changes of compound 1 ( $3.2 \times 10^{-6}$  M) in methylene dichloride upon addition of L-Val-OEt as the host: guest molar ratio changes from 1:0 to 1:167.5 at 25 °C. Arrows indicate absorbance changes with increasing guest concentrations.

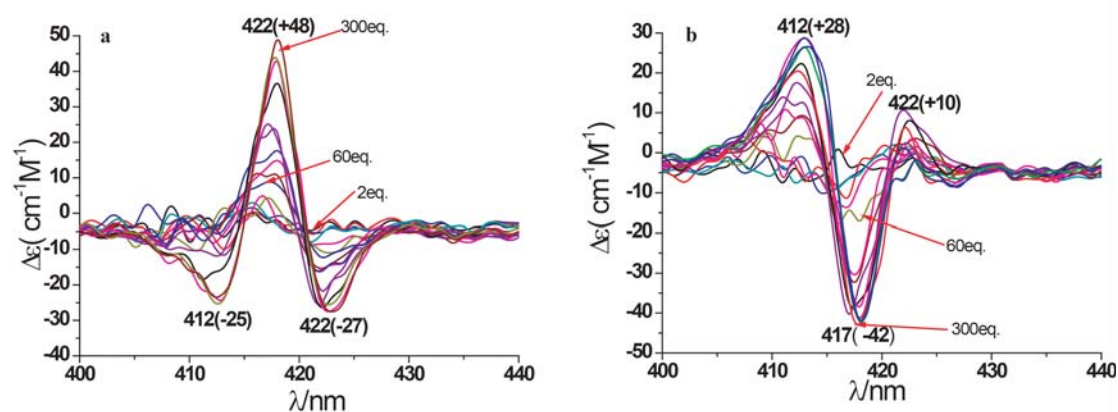

**Figure S11.** Circular dichroism spectra of a solution of compound **1** ( $3.4 \times 10^{-6}\text{M}$ ) and from 1:2 to 1:300 equivalents of (a) D- alanine ethyl ester, (b) L- alanine ethyl ester in methylene dichloride at 25 °C.

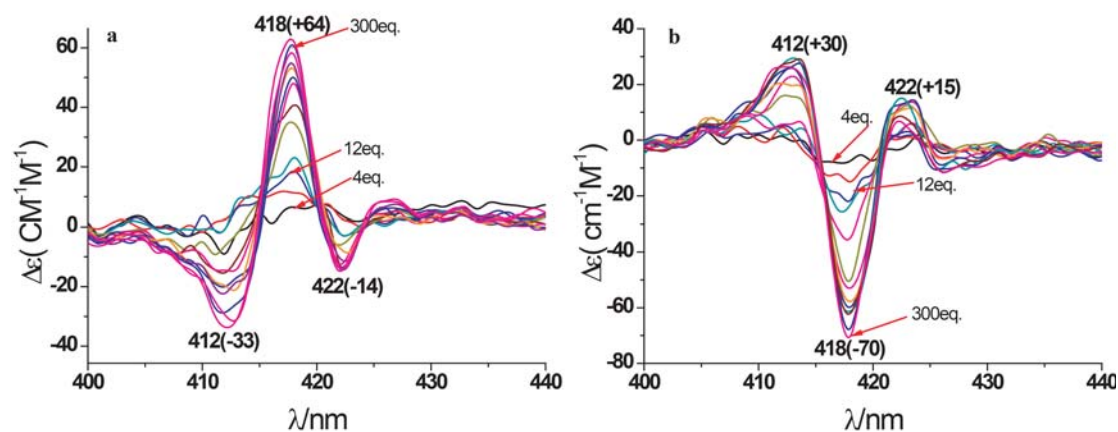

**Figure S12.** Circular dichroism spectra of a solution of compound **1** ( $3.4 \times 10^{-6}\text{M}$ ) and from 1:4 to 1:300 equivalents of (a) D- valine ethyl ester, (b) L- valine ethyl ester in methylene dichloride at 25 °C.



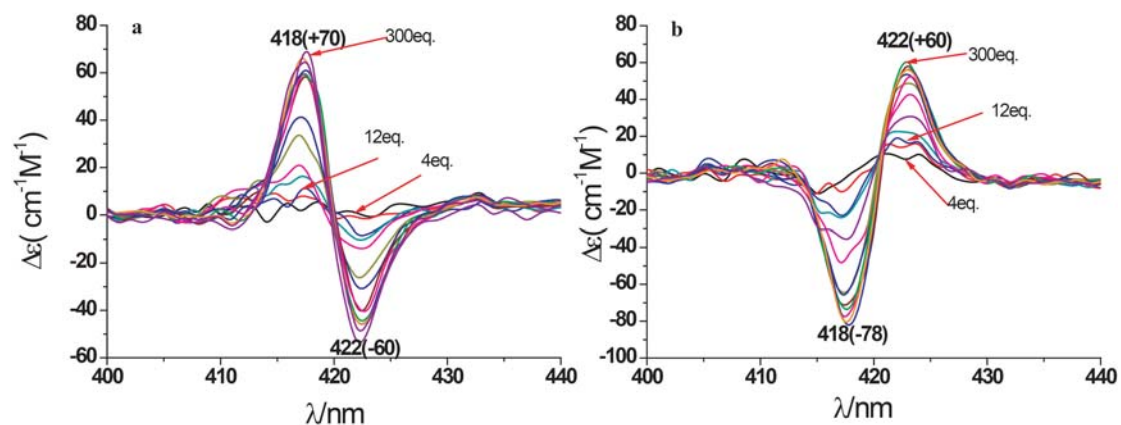

**Figure S13.** Circular dichroism spectra of a solution of compound **1** ( $3.4 \times 10^{-6}\text{M}$ ) and from 1:4 to 1:300 equivalents of (a) D- leucine ethyl ester, (b) L- leucine ethyl ester in methylene dichloride at 25 °C.

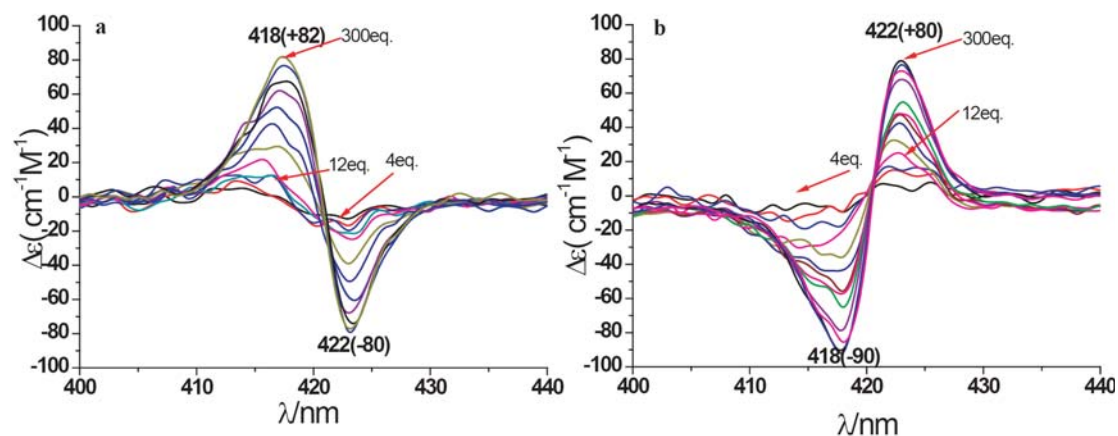

**Figure S14.** Circular dichroism spectra of a solution of compound **1** ( $3.4 \times 10^{-6}\text{M}$ ) and from 1:4 to 1:300 equivalents of (a) D- phenyl alanine ethyl ester, (b) L- phenyl alanine ethyl ester in methylene dichloride at 25 °C.

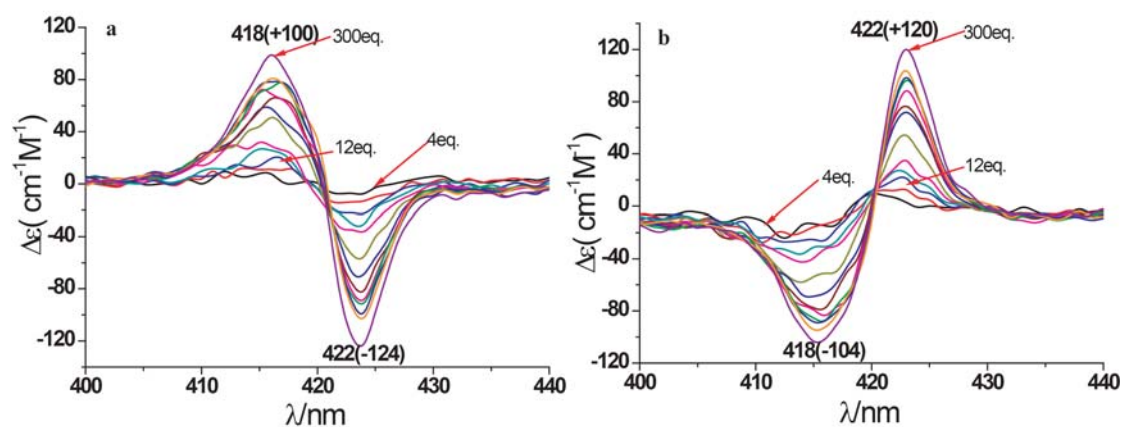

**Figure S15.** Circular dichroism spectra of a solution of compound **1** ( $3.4 \times 10^{-6}\text{M}$ ) and from 1:4 to 1:300 equivalents of (a) D- phenylglycine ethyl ester, (b) L-phenylglycine ethyl ester in methylene dichloride at 25 °C.

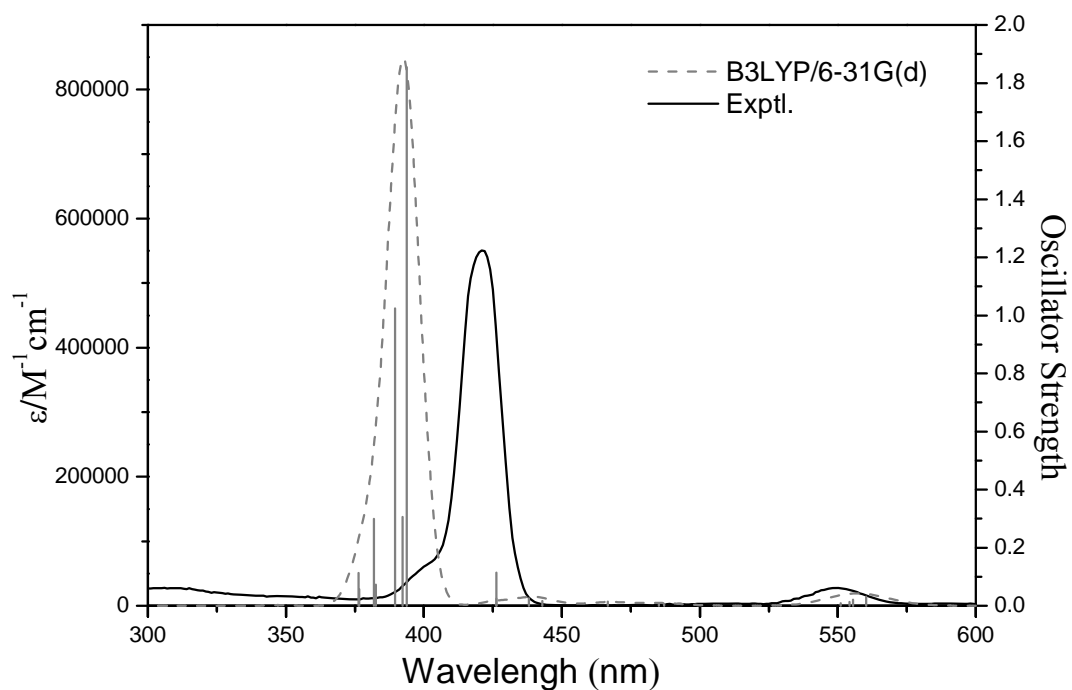

**Figure S16.** UV-vis spectrum of complex formed between compound **1** and L-Phe-OEt. (black line), calculated UV-vis curve at the B3LYP/6-31G\* level (dash line), and oscillator strengths for the different transitions (gray bars).

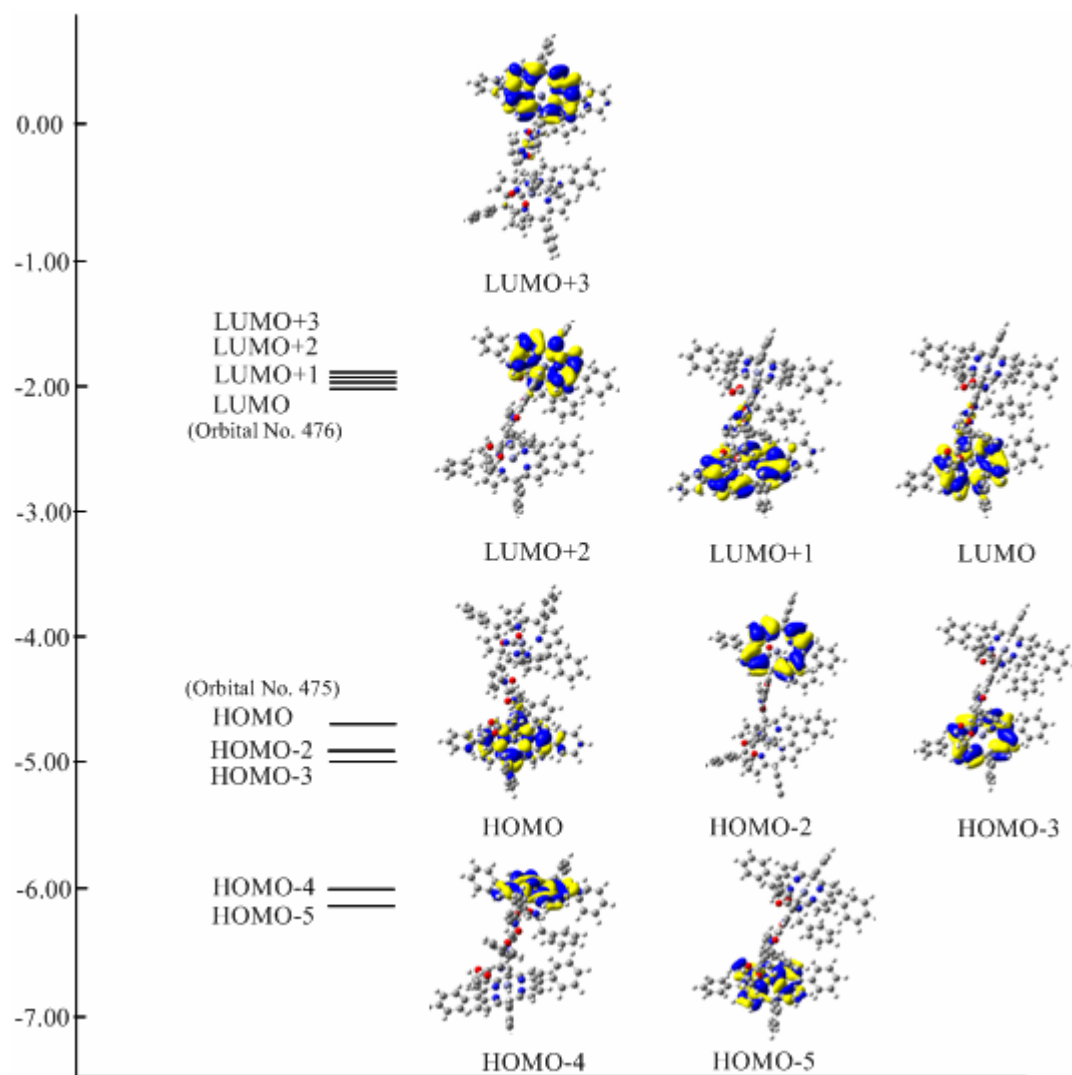

**Figure S17.** Selected HOMO and LUMO orbital plots at the B3LYP/6-31G\* level.

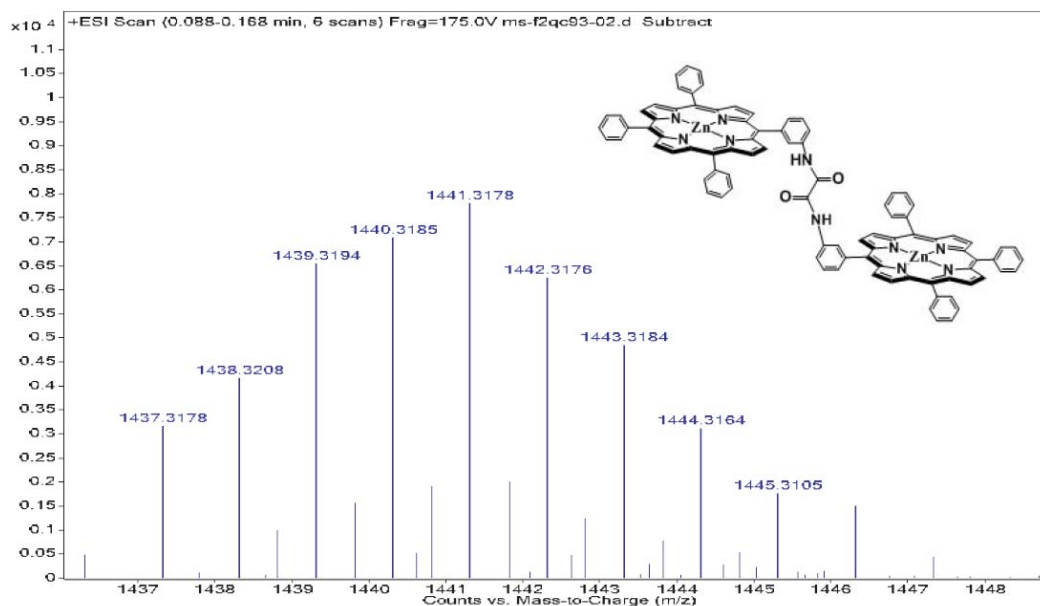

Figure S18. Mass spectrum of the compound 1.

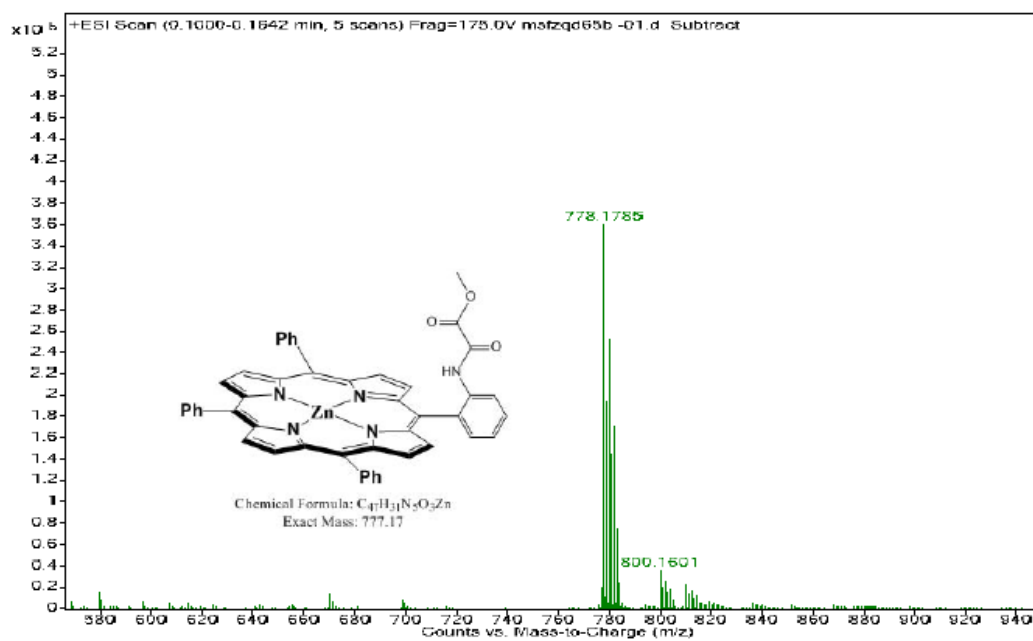

Figure S19. Mass spectrum of the compound 2.

Table S1. Selected bond distances for the calculated structure of complex  
**1**·(L-Phe-OEt)<sub>2</sub>

| bond           | distance (Å) |
|----------------|--------------|
| Zn(1)-N(55)    | 2.1754       |
| Zn(1)-N(2)     | 2.0865       |
| Zn(1)-N(3)     | 2.0857       |
| Zn(1)-N(4)     | 2.0906       |
| Zn(1)-N(5)     | 2.0946       |
| Zn(108)-N(109) | 2.0976       |
| Zn(108)-N(110) | 2.0833       |
| Zn(108)-N(111) | 2.0794       |
| Zn(108)-N(112) | 2.0997       |
| Zn(108)-N(162) | 2.1717       |
| N(55)---O(165) | 3.2065       |
| N(162)---O(58) | 3.0654       |

Table S2 Main Experimental and Calculated Optical Transitions

| Orbital Excitations | Character                         | Calcd/nm | $f^a$  | Exptl/nm |
|---------------------|-----------------------------------|----------|--------|----------|
| HOMO-2<br>→LUMO+3   | $\pi \rightarrow \pi^*$           | 394      | 1.8540 | 422      |
| HOMO-3<br>→LUMO     | $\pi \rightarrow \pi^*$           |          |        |          |
| HOMO-3<br>→LUMO+1   | $\pi \rightarrow \pi^*$           | 392      | 0.3055 |          |
| HOMO-2<br>→LUMO+3   | $\pi \rightarrow \pi^*$           |          |        |          |
| HOMO-2<br>→LUMO+2   | $\pi \rightarrow \pi^*$           | 390      | 1.0245 |          |
| HOMO-4<br>→LUMO+2   | $\pi \rightarrow \pi^*$ ,<br>MLCT | 382      | 0.2986 | 416      |
| HOMO-5<br>→LUMO     | $\pi \rightarrow \pi^*$ ,<br>MLCT |          |        |          |
| HOMO-4<br>→LUMO+3   | $\pi \rightarrow \pi^*$ ,<br>MLCT | 377      | 0.0570 |          |
| HOMO-5<br>→LUMO+1   | $\pi \rightarrow \pi^*$ ,<br>MLCT | 376      | 0.1133 |          |
| HOMO-4<br>→LUMO+3   | $\pi \rightarrow \pi^*$ ,<br>MLCT |          |        |          |

<sup>a</sup> Oscillator strength
